# Supplementary material for: Intratracheal Administration of siRNA Triggers mRNA Silencing in the Lung to Modulate T Cell Immune Response and Lung Inflammation
Source: PubMed Central journal article supplement — Mol Ther Nucleic Acids. 2019 Feb 26;16:194–205. doi: 10.1016/j.omtn.2019.02.013 (PMC6426712; doi:10.1016/j.omtn.2019.02.013), 2019-02-26
Supplement: mmc1.pdf [file mmc1.pdf]

OMTN, Volume 16

## **Supplemental Information**

### **Intratracheal Administration of siRNA Triggers mRNA Silencing in the Lung to Modulate T Cell Immune Response and Lung Inflammation**

**Bruce Ng, Tanesha Cash-Mason, Yi Wang, Jessica Seitzer, Julja Burchard, Duncan Brown, Vadim Dudkin, Joseph Davide, Vasant Jadhav, Laura Sepp-Lorenzino, and Pedro J. Cejas**

Supplemental Figure 1. Primary sequences and chemical modifications of siRNAs used in this paper.

| Figure | Name                 | Structure/sequence |
|--------|----------------------|--------------------|
| 1      | si-Ssb               |                    |
|        | si-Ctnnb1            |                    |
|        | si-Ctnnb1 GalNAc     |                    |
| 2      | si-Ctnnb1 2'-OH      |                    |
|        | si-Ctnnb1 2'-F/OMe   |                    |
| 3      | si-Ctnnb1 DyLight650 |                    |
| 4,5,6  | si-Ctnnb1 VP         |                    |
| 5      | si-Ctnnb1 VP/hexaPEG |                    |
|        | si-Ctnnb1 VP/30KPEG  |                    |
| 7      | si-Tnfsf4            |                    |
|        | control              |                    |

Key

- A adenosine
- U uracil
- C cytosine
- T thymine
- G guanine
- 2'-H
- 2'-F
- 2'-OH
- 2'-OMe
- cycloaddition
- 5'-VP, 2'-H
- 5'-VP, 2'-OMe
- ▲ inverted abasic
- └ C<sub>6</sub>-amino
- p 5'- phosphate
- ◆ DyLight 650
- v VP
- └ 5'-3' phosphorothioate
- └ 5'-2' phosphorothioate
